# Supplementary material for: Preparation of hydrophobic porous Au–Ag alloy nanoparticle arrays and their SERS properties
Source: Royal Society of Chemistry journal article supplement (doi:10.1039/d3ra06284h), 2023-01-01
Supplement: d3ra06284h1.pdf [file d3ra06284h1.pdf]

## Preparation of hydrophobic porous Au-Ag alloy nanoparticle arrays and SERS property

Ming Kong<sup>1</sup>, Yingyi Wu<sup>2</sup>, Dandan Men<sup>2</sup>, Qianqian Ding<sup>1</sup>, Honghua Zhang<sup>2\*</sup>

(1. Department of Precision Manufacturing Engineering, Suzhou Vocational Institute of Industrial  
Technology, Suzhou, 215104, China)

(2. Jiangxi Key Laboratory of Material Surface Engineering, School of Material and Energy,  
Jiangxi Science and Technology Normal University, Nanchang 330013, China)

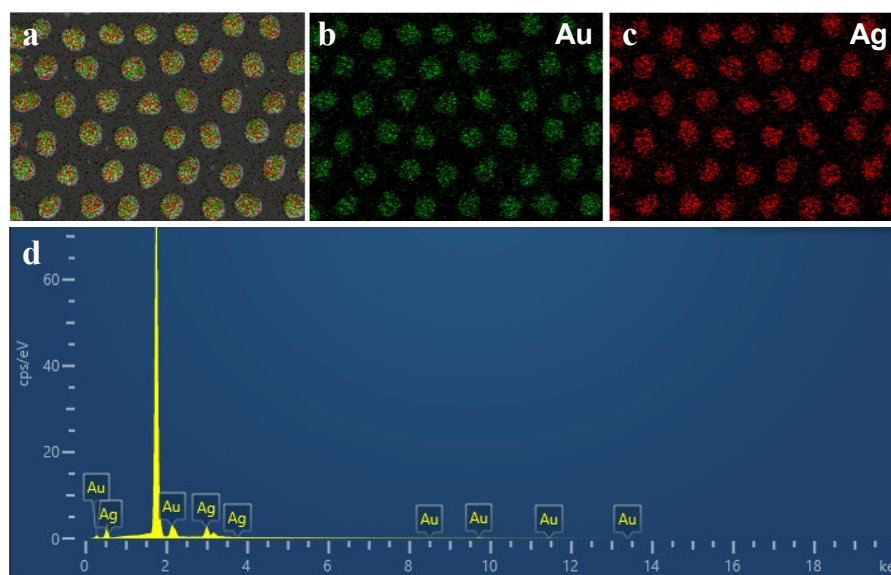

Fig. S1 The EDS elemental mapping (a-c) and EDS spectrum (d) of the Au-Ag alloy nanoparticle arrays.

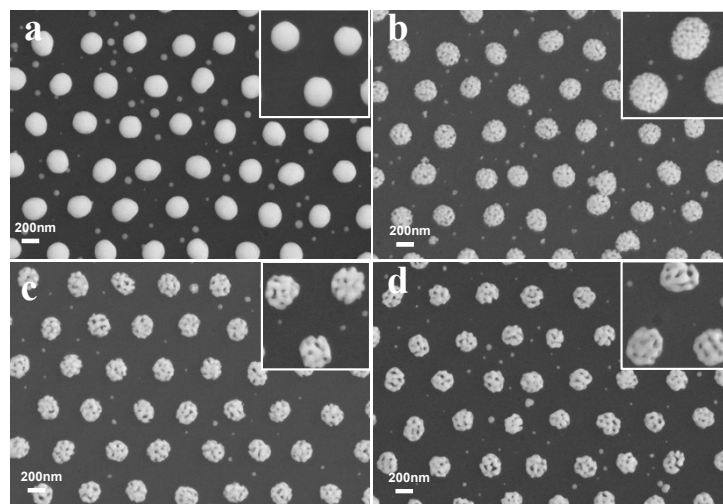

Fig.S2 SEM images of hydrophobic Au-Ag-Au alloy nanoparticles orderly array obtained by Ag deposition time: (a) 60 s, (b) 90 s, (c)120 s and (d) 150 s. Insert is the magnified SEM images of the obtained nanoparticle.
